# Supplementary material for: Mutations in JAK/STAT and NOTCH1 Genes Are Enriched in Post-Transplant Lymphoproliferative Disorders
Source: PubMed Central journal article supplement (PMC8801788; doi:10.3389/fonc.2021.790481), 2022-01-17

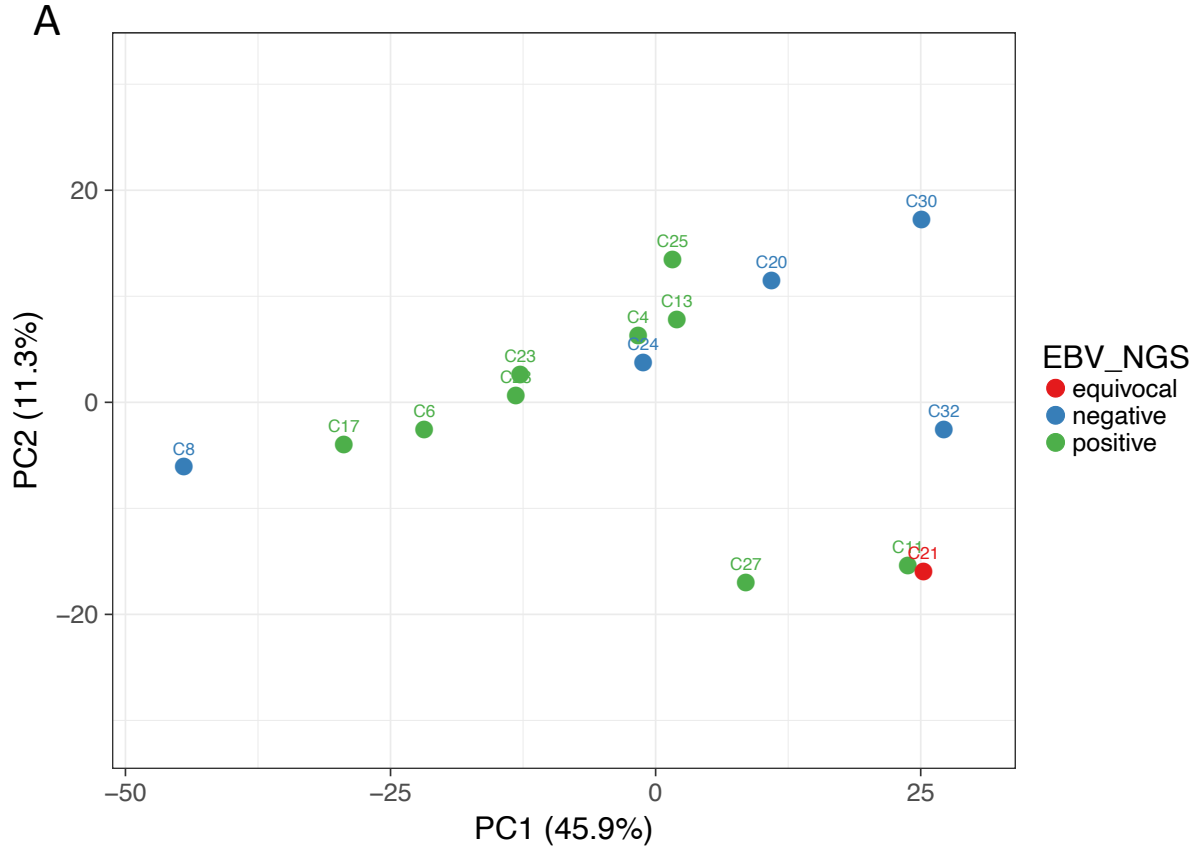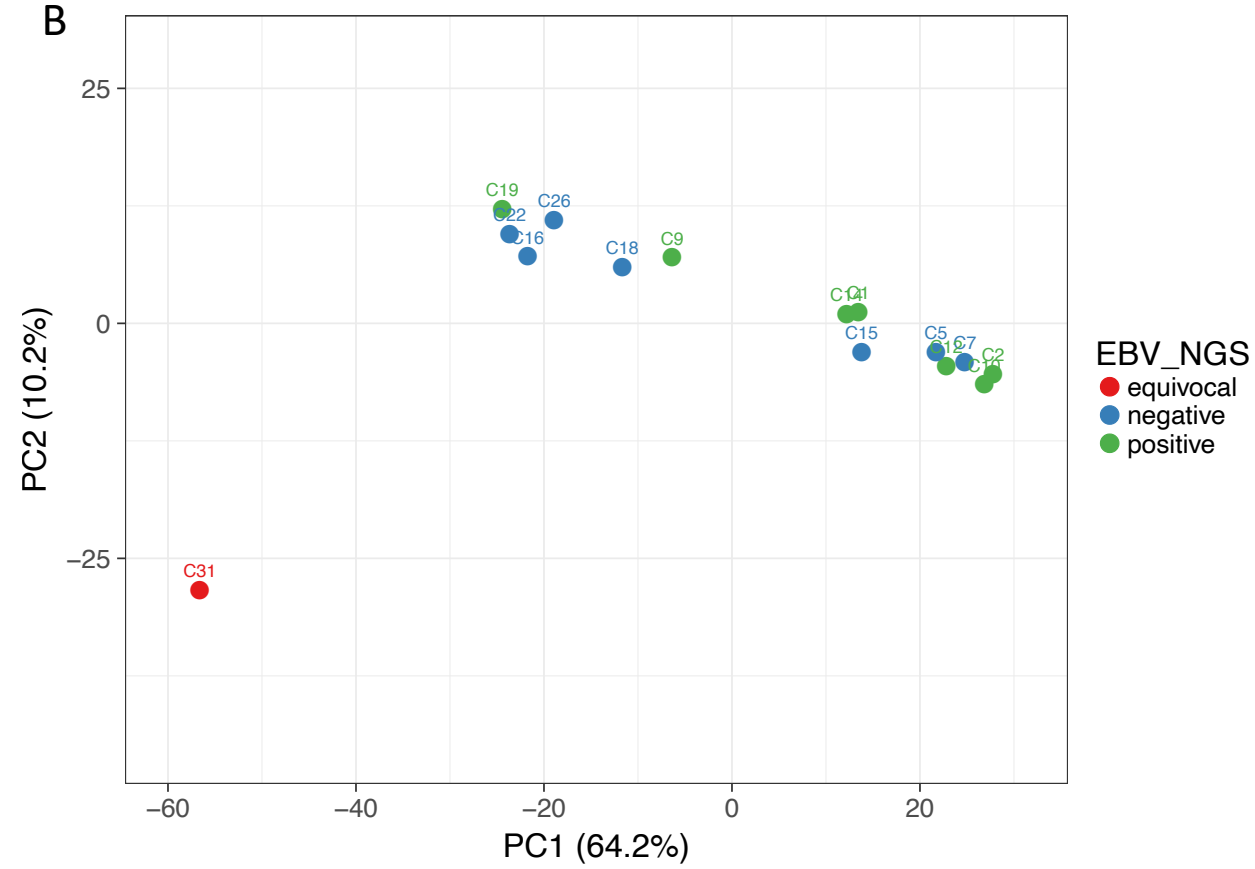

Supplement: DataSheet_1.pdf [file DataSheet_1.pdf]
